# Supplementary material for: Plastic waste release caused by COVID-19 and its fate in the global ocean
Source: PubMed Central journal article supplement — Proc Natl Acad Sci U S A. 2021 Nov 8;118(47):e2111530118. doi: 10.1073/pnas.2111530118 (PMC8617455; doi:10.1073/pnas.2111530118), 2021-11-08
Supplement: pnas.2111530118.sapp.pdf [file pnas.2111530118.sapp.pdf]

1  
2  
3  
4  
5  
6  
7  
8  
9  
10  
11  
12  
13  
14  
15  
16  
17

Supporting Information for

# Plastic Release during COVID-19 and its Fate in the Global Ocean

Yiming Peng<sup>1#</sup>, Peipei Wu<sup>1#</sup>, Amina T. Schartup<sup>2</sup>, Yanxu Zhang<sup>1\*</sup>

<sup>1</sup>School of Atmospheric Sciences, Nanjing University, Nanjing, China.

<sup>2</sup>Scripps Institution of Oceanography, University of California at San Diego, La Jolla, CA, USA.

<sup>#</sup>These authors contributed equally to this work.

\*Correspondence to: zhangyx@nju.edu.cn

**This PDF file includes:**

- Fig. S1
- Fig. S2
- Fig. S3
- Table S1

18 **Table S1 | The generation of mismanaged plastic waste from four sources in**  
 19 **different continents.**

| <b>Sources</b><br><b>Continents</b> | Hospital<br>(tons) | Test Kits<br>(tons) | PPE<br>(tons) | Packaging<br>(tons) |
|-------------------------------------|--------------------|---------------------|---------------|---------------------|
| Africa                              | 512003             | 9085                | 141790        | 0                   |
| Asia                                | 3104755            | 8876                | 416121        | 359855              |
| Europe                              | 1922557            | 3853                | 40153         | 32604               |
| North America                       | 442228             | 2254                | 20255         | 2746                |
| Oceania                             | 767                | 0                   | 1671          | 201                 |
| South America                       | 1362599            | 2719                | 17165         | 941                 |

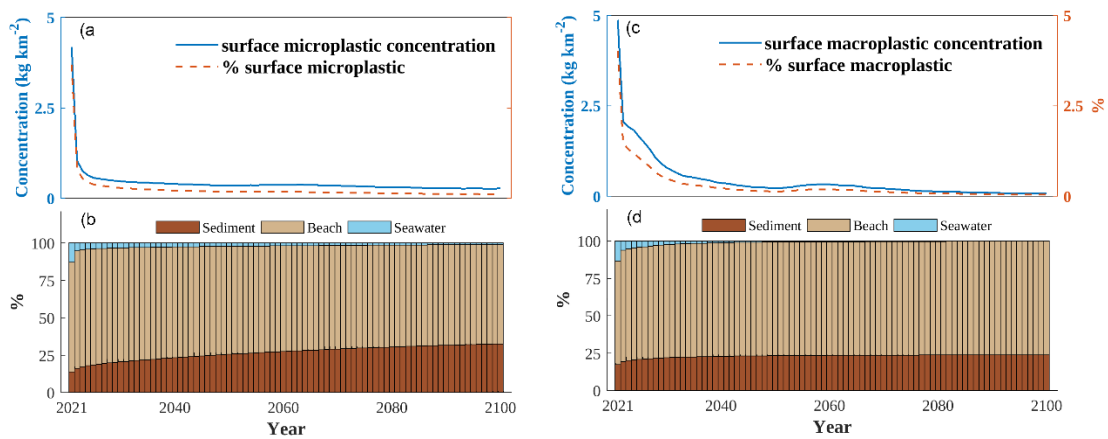

21 **Fig. S1 | Projection of the mass fractions of discharged pandemic-associated**  
 22 **microplastics (a and b) and macroplastics (c and d). Panels a and c show the fraction**  
 23 **of plastics in the surface ocean, while b and d are the fractions in seawater, beach, and**  
 24 **sediment.**

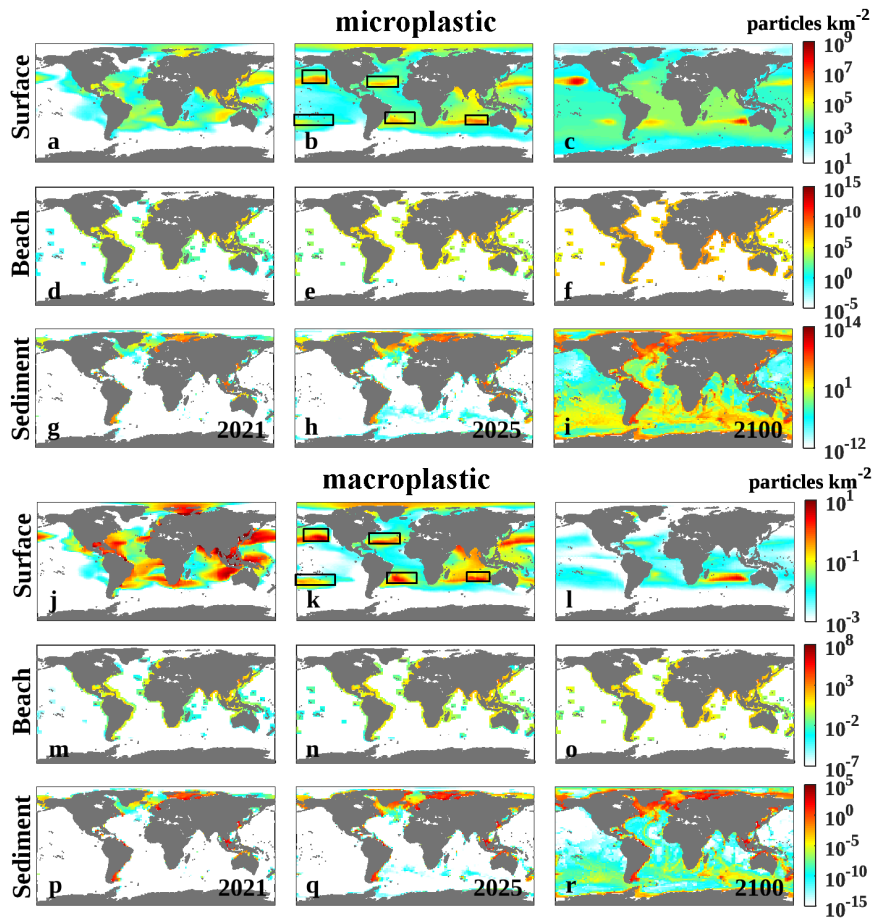

26 **Fig. S2** | Modeled spatial distribution of the number concentrations of COVID-19  
 27 associated plastics in the surface ocean (a-c, j-l), one the beaches (d-f, m-o), and the  
 28 seabed (g-i, p-r) in 2021, 2025, and 2100. The black boxes on the top panel indicate  
 29 the five subtropical ocean gyres (North Pacific Gyre, North Atlantic Gyre, South  
 30 Pacific Gyre, South Atlantic Gyre, and Indian Gyre). Panels a-i are for the  
 31 microplastics, while j-r are for the macroplastics.

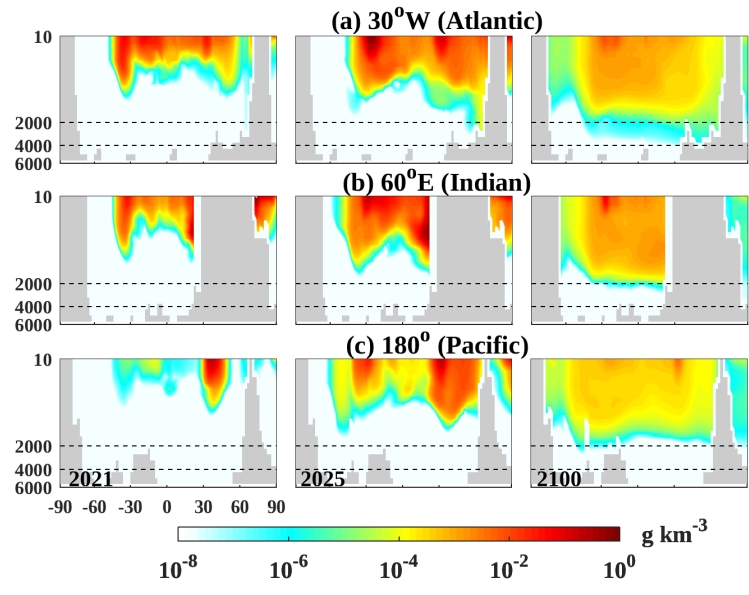

33 **Fig. S3** | Vertical distribution of plastics in ocean along the meridional profile (in g  
 34  $\text{km}^{-3}$ ). The year is the same as above. The shaded area represent seabed.
